# Supplementary material for: Earthquakes triggered by the subsurface undrained response to reservoir impoundment at Irapé, Brazil
Source: Copernicus journal article supplement (doi:10.5194/se-15-1407-2024), 2024-11-29
Supplement: Supplementary file 1 [file se-15-1407-2024-supplement.pdf]

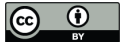

*Supplement of*

## **Earthquakes triggered by the subsurface undrained response to reservoir impoundment at Irapé, Brazil**

**Haris Raza et al.**

*Correspondence to:* Haris Raza ([harisraza90@yahoo.com](mailto:harisraza90@yahoo.com)) and Victor Vilarrasa ([victor.vilarrasa@csic.es](mailto:victor.vilarrasa@csic.es))

The copyright of individual parts of the supplement might differ from the article licence.

# 1 1 Content

2 This supplementary material contains three tables providing data of seismicity and  
3 information on sampling, sample preparation, measurement procedures with equipment  
4 details, including three figures and generated data in Tables S2 and S3.

## 5 2 Seismicity data

6 **Table S1.** Hypocentral location of the main earthquakes triggered during the first half of  
7 2006.

| No | Date       | Hours<br>(UTC) | Latitude  | Longitude | EH<br>(km) | Depth<br>(km) | Magnitude | Q  |
|----|------------|----------------|-----------|-----------|------------|---------------|-----------|----|
| 1  | 07/01/2006 | 03:29:34       | -16.73417 | -42.59028 | 1.3        | 0.26          | 1.8       | D1 |
| 2  | 10/01/2006 | 03:06:56       | -16.72889 | -42.60278 | 0.5        | 4.02          | 1.4       | C1 |
| 3  | 10/01/2006 | 03:33:53       | -16.73278 | -42.60778 | 0.9        | 0.04          | 1.7       | C1 |
| 4  | 12/01/2006 | 06:05:50       | -16.73667 | -42.60944 | 2.3        | 0.01          | 1.8       | C1 |
| 5  | 13/01/2006 | 02:29:04       | -16.72083 | -42.61806 | 2.8        | 4.09          | 1.0       | C1 |
| 6  | 14/01/2006 | 05:19:31       | -16.73528 | -42.60694 | 0.7        | 0.07          | 1.4       | C1 |
| 7  | 15/01/2006 | 17:14:30       | -16.73389 | -42.60444 | 0.5        | 0.03          | 1.9       | C1 |
| 8  | 19/01/2006 | 04:01:25       | -16.73889 | -42.54889 | 6.5        | 0.47          | 2.3       | D1 |
| 9  | 19/01/2006 | 13:57:39       | -16.71306 | -42.58944 | 1.8        | 0.08          | 1.6       | C1 |
| 10 | 23/01/2006 | 08:22:34       | -16.75500 | -42.61917 | 1.8        | 0.43          | 1.7       | C1 |
| 11 | 23/01/2006 | 12:51:07       | -16.75833 | -42.60556 | 2.1        | 0.13          | 1.5       | D1 |
| 12 | 02/03/2006 | 07:33:56       | -16.75417 | -42.61861 | 2.5        | 0.44          | 1.9       | C1 |
| 13 | 02/03/2006 | 09:10:06       | -16.73556 | -42.55722 | 2.1        | 0.5           | 1.3       | D1 |
| 14 | 12/03/2006 | 06:08:22       | -16.69167 | -42.60333 | 2.1        | 0.51          | 1.4       | C1 |
| 15 | 13/03/2006 | 08:33:16       | -16.75111 | -42.60972 | 2.6        | 0.12          | 1.3       | D1 |
| 16 | 16/03/2006 | 01:46:22       | -16.70361 | -42.62944 | 1.2        | 11.42         | 1.6       | C1 |
| 17 | 17/03/2006 | 00:19:58       | -16.73750 | -42.62333 | 1.1        | 7.47          | 1.4       | C1 |
| 18 | 19/03/2006 | 02:18:20       | -16.77167 | -42.62000 | 2.4        | 0.07          | 1.5       | C1 |
| 19 | 28/04/2006 | 08:24:10       | -16.77167 | -42.61833 | 1.3        | 0.44          | 1.5       | D1 |
| 20 | 28/04/2006 | 09:26:34       | -16.76806 | -42.64917 | 2.8        | 6.84          | 2.1       | C1 |
| 21 | 28/04/2006 | 16:39:56       | -16.75528 | -42.60889 | 1.0        | 0.14          | 1.4       | D1 |
| 22 | 03/05/2006 | 10:46:54       | -16.77639 | -42.65250 | 3.6        | 11.08         | 1.6       | C1 |
| 23 | 03/05/2006 | 21:19:05       | -16.77278 | -42.62306 | 3.0        | 0.1           | 1.6       | C1 |
| 24 | 07/05/2006 | 15:46:32       | -16.71389 | -42.58444 | 1.7        | 0.02          | 1.5       | D1 |
| 25 | 08/05/2006 | 18:05:22       | -16.73333 | -42.61528 | 2.0        | 0.02          | 1.6       | C1 |
| 26 | 12/05/2006 | 21:34:18       | -16.75333 | -42.61778 | 1.0        | 0.45          | 1.5       | C1 |
| 27 | 14/05/2006 | 14:07:46       | -16.73111 | -42.57750 | 2.7        | 3.88          | 3.0       | D1 |
| 28 | 14/05/2006 | 15:24:53       | -16.72194 | -42.57972 | 1.8        | 8.42          | 1.9       | D1 |
| 29 | 15/05/2006 | 09:23:14       | -16.72222 | -42.56722 | 1.4        | 0.37          | 1.7       | D1 |

8 (UTC: Coordinated Universal Time, **EH (km)**: Horizontal location error, **Depth (km)**:  
9 HYPO71 Program output hypocentral depth of events, **Q**: Quality of events, where C1 and  
10 D1 have two family groups which refer to the family-based events subsequently).

11 The quality of events has been classified based on Root mean square error. The earthquake  
12 quality of C1 is more accurate than D1, so these events are classified into two groups that  
13 show the class of events. Nevertheless, D1 has generally 0.1 of the root mean square residual  
14 in-depth errors, so these values of uncertainty are generally accepted. However, the analysis

15 of seismograms went through a double-check routine (Silva et al., 2014). The uncertainty of  
16 earthquakes was generally less than 0.1 of the roots mean square residual in depth errors. In  
17 this work, we did not consider this factor as an influencing element.

### 18 **3 Field sampling, sample preparation, and measurement procedures with equipment** 19 **details**

20 Rock samples in this study comprise core plugs from bulk samples of mica-schist rock  
21 collected around the reservoir by pitting of 0.10 m at different locations. Mica-schist is  
22 metamorphic rock, its colour is shiny, blackish to medium grey, and textures are foliated, fine  
23 to medium-grained.

24 All collected samples are close to the dam as well as to seismic stations since the epicenter  
25 of the main event was encountered about 1 km from the dam (Figure 3 in manuscript). We  
26 collected a total of seven sets of samples. Nonetheless, we could only test three sets, from  
27 which we could prepare a total of 11 cores of hard and intact samples (Figure 4 in  
28 manuscript). The rest of the samples were fragile and fractured during the coring from bulk  
29 samples. We extracted the core samples in shape of cylindrical plugs perpendicular to the  
30 bedding plane of rocks (Figure S1).

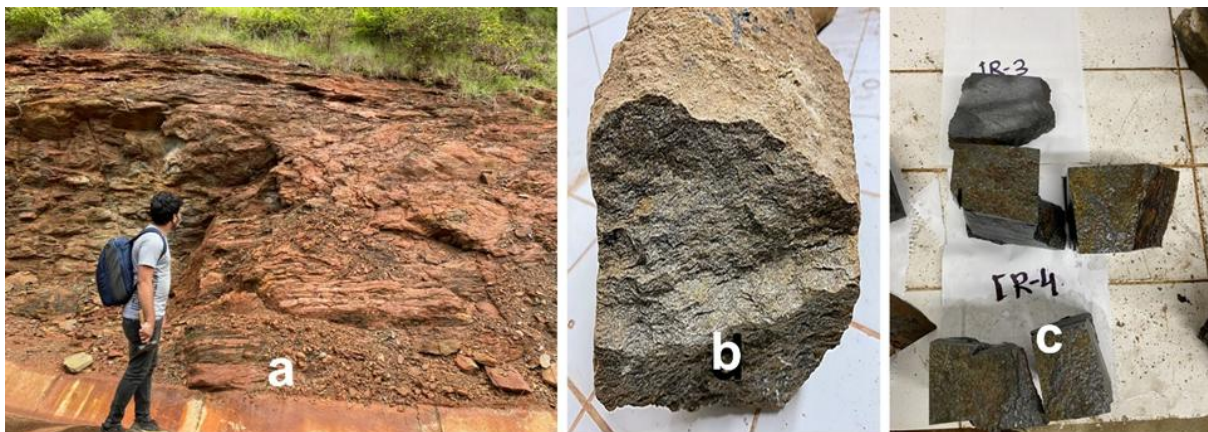

31  
32 **Figure S1. a.** Outcrop of mica-schist near the Irapé dam (photos taken during the field trip) **b.**  
33 bulk sample extracted from the dam area **c.** cutting and washing of bulk samples to retrieve  
34 the core plugs.

35 All samples are in the form of cylindrical plugs that have length ranging from 3.8 to 5.0 cm  
36 and diameter is of 2.50 cm, which meets the standard criteria to test the core plugs samples  
37 by Ultra-Pore 300 and Ultra-Perm 610 (see the equipment descriptions).

### 38 **Ultra-Perm 610 (Core Lab Instruments)**

39 The permeability tests have been performed using UltraPerm-600 (Figure S2). UltraPerm-  
40 600 is a steady-state air permeameter, in which back pressure control allows constant rate or  
41 constant mean pressure. The instrument allows the determination of permeability up to 3.0  
42 mD. Thus, the lowest permeability 0.002 mD is assigned (Table S2). The Ultra-Perm 610  
43 Permeameter uses advanced precision mass flow meters and pressure transducers to measure  
44 absolute permeability of rock. The core plugs should be around 2.5 cm in diameter and

45 around 4.0 cm in length. By combining automated data acquisition and real-time graphics  
46 with mass flow determinations, greater accuracy and precision of the data are obtained  
47 (Haskett et al.,1988). The operating software allows permeability data to be easily related to  
48 historical and current databases generated by different techniques.

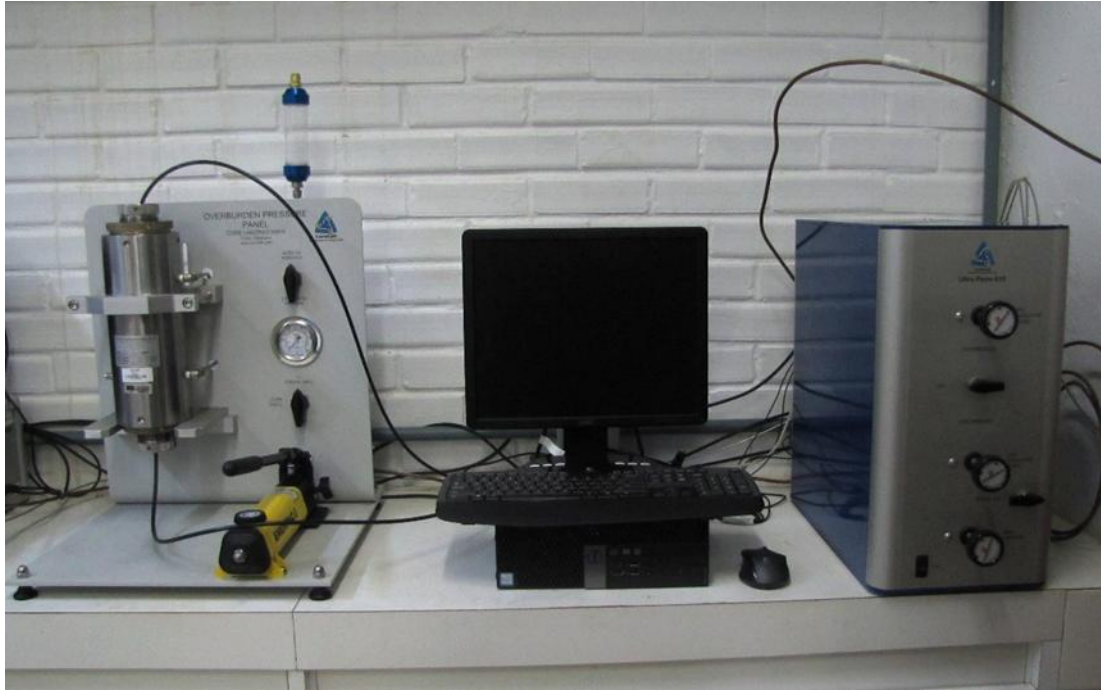

49  
50 **Figure S2.** Ultra-Perm 610 gas permeameter with pressure sample saturator (Core Lab  
51 Instruments).

52

53 **Ultra-Pore 300 (Core Lab Instruments)**

54 We have measured porosity values using Ultra-Pore 300 (Core Lab Instruments) (Figure  
55 S3 and Table S3). The models of the equipment are made by Core lab Instruments, in Texas,  
56 USA. UltraPore-300 is a gas expansion helium pycnometer for the determination of grain  
57 volume or pore volume of core plug and full diameter samples.

58

59

60

61

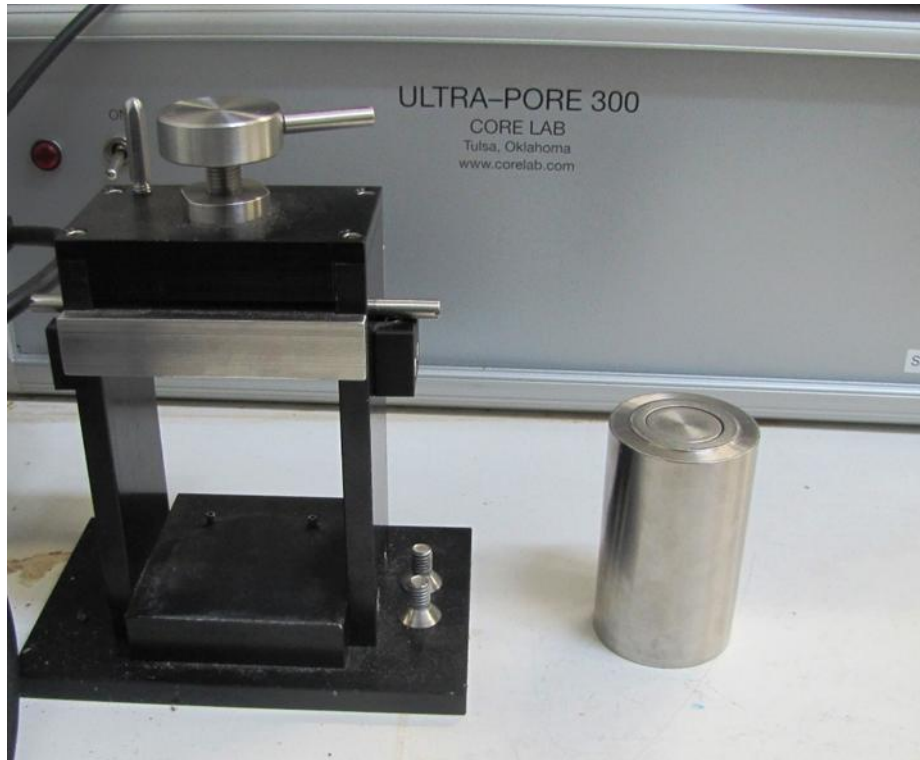

62

63 **Figure S3.** Ultra-Pore 300 Porosimeter with matrix cup and analysis plugs.

64 Matrix cups for the 2.5-3.8 cm diameter of samples with Setra 204 transducer rated for 0-1.72  
65 MPa. The pore volume hypothesizes through the nitrogen gas (N<sub>2</sub>) expansion technique. The  
66 system can be used in grain volume or pore volume measurement mode, depending on  
67 sample holder configuration. It has multiple volumes built into the system, which allow it to  
68 be used for small discs (cuttings), plugs and full diameter samples. More information about  
69 this equipment in accordance with international standards can be accessed at  
70 [www.lpfr.igd.unb.br/infraestrutura/porosimetro](http://www.lpfr.igd.unb.br/infraestrutura/porosimetro) and [www.corelab.com/cli/routine-](http://www.corelab.com/cli/routine-rock/ultrapore-porosimeter)  
71 [rock/ultrapore-porosimeter.](http://www.corelab.com/cli/routine-rock/ultrapore-porosimeter)

72 .

73

74

75

76

**Table S2.** List of permeability data measured from cylindrical plug samples (Barometric pressure (PSI) atm, Upstream Pressure=psig, Gas viscosity=cp,  $Q$ = Gas flow rate at cc/sec)

| No | Sample ID | Depth (m) | Length (cm) | Diameter (cm) | Temp (°C) | Barometric Pressure (PSI) | Confining Pressure | Upstr Pres (psig) | P1 (atm) | P2 (atm) | Q (cc/sec) | K-air (md) | P mean (atm) | K-inf (md) | b (atm) | Beta | Visc (cP) | Q unadj (cc/s) |
|----|-----------|-----------|-------------|---------------|-----------|---------------------------|--------------------|-------------------|----------|----------|------------|------------|--------------|------------|---------|------|-----------|----------------|
| 1  | IR-1a     | 0.1       | 4.90        | 2.50          | 22        | 14.70                     | 500                | 2.78              | 1.1894   | 1.0003   | 0.000      | <0.002     | 1.0949       | 0          | 0       | 0    | 0.01756   | 0.0000         |
| 2  | IR-1b     | 0.1       | 4.90        | 2.50          | 22        | 14.70                     | 500                | 2.64              | 1.1799   | 1.0003   | 0.000      | <0.002     | 1.0902       | 0          | 0       | 0    | 0.01756   | 0.0000         |
| 3  | IR-1c     | 0.1       | 4.90        | 2.50          | 22        | 14.70                     | 500                | 2.42              | 1.1649   | 1.0003   | 0.000      | <0.002     | 1.0827       | 0          | 0       | 0    | 0.01756   | 0.0000         |
| 4  | IR-1d     | 0.1       | 4.00        | 2.50          | 22        | 14.70                     | 500                | 2.66              | 1.1813   | 1.0003   | 0.000      | 0.0098     | 1.0907       | 0          | 0       | 0    | 0.01756   | 0.0005         |
| 5  | IR-2a     | 0.1       | 4.10        | 2.50          | 22        | 14.70                     | 500                | 2.69              | 1.1833   | 1.0003   | 0.000      | <0.002     | 1.0919       | 0          | 0       | 0    | 0.01756   | 0.0000         |
| 6  | IR-2b     | 0.1       | 3.80        | 2.50          | 22        | 14.70                     | 500                | 2.61              | 1.1779   | 1.0003   | 0.000      | 0.0038     | 1.0890       | 0          | 0       | 0    | 0.01756   | 0.0002         |
| 7  | IR-2c     | 0.1       | 3.80        | 2.50          | 22        | 14.70                     | 500                | 2.61              | 1.1779   | 1.0003   | 0.000      | 0.0038     | 1.0892       | 0          | 0       | 0    | 0.01756   | 0.0002         |
| 8  | IR-3a     | 0.1       | 5.00        | 2.50          | 22        | 14.70                     | 500                | 2.65              | 1.1806   | 1.0003   | 0.000      | <0.002     | 1.0904       | 0          | 0       | 0    | 0.01756   | 0.0000         |
| 9  | IR-3b     | 0.1       | 5.00        | 2.50          | 22        | 14.70                     | 500                | 2.61              | 1.1779   | 1.0003   | 0.000      | <0.002     | 1.0890       | 0          | 0       | 0    | 0.01756   | 0.0000         |
| 10 | IR-3c     | 0.1       | 4.60        | 2.50          | 22        | 14.70                     | 500                | 2.71              | 1.1847   | 1.0003   | 0.000      | <0.002     | 1.0923       | 0          | 0       | 0    | 0.01756   | 0.0000         |
| 11 | IR-3d     | 0.1       | 4.00        | 2.50          | 22        | 14.70                     | 500                | 2.71              | 1.1847   | 1.0003   | 0.000      | <0.002     | 1.0923       | 0          | 0       | 0    | 0.01756   | 0.0000         |

⊥ Experiments loaded perpendicular to bedding plane

**Table S3.** List of porosity data measured from cylindrical plug samples

| NO. | Sample ID | Depth (m) | Dry Weight (g) | Grain Volume (cc) | Grain Density (g/cc) | Pore Volume (cc) | Porosity (%) | Hg Bulk Vol. (cc) | Length (cm) | Diam. (cm) | Calliper Bulk Vol (cc) |
|-----|-----------|-----------|----------------|-------------------|----------------------|------------------|--------------|-------------------|-------------|------------|------------------------|
| 1   | IR-1a     | 0.1       | 57.56          | 22.2416           | 2.588                | 1.811            | 7.5          | 0                 | 4.90        | 2.50       | 24.053                 |
| 2   | IR-1b     | 0.1       | 58.03          | 22.4214           | 2.588                | 1.632            | 6.8          | 0                 | 4.90        | 2.50       | 24.053                 |
| 3   | IR-1c     | 0.1       | 57.46          | 21.9409           | 2.619                | 2.112            | 8.8          | 0                 | 4.90        | 2.50       | 24.053                 |
| 4   | IR-1d     | 0.1       | 47.62          | 18.3480           | 2.595                | 1.287            | 6.6          | 0                 | 4.00        | 2.50       | 19.635                 |
| 5   | IR-2a     | 0.1       | 50.82          | 18.2157           | 2.790                | 1.910            | 9.5          | 0                 | 4.10        | 2.50       | 20.126                 |
| 6   | IR-2b     | 0.1       | 45.86          | 16.7010           | 2.746                | 1.952            | 10.5         | 0                 | 3.80        | 2.50       | 18.653                 |
| 7   | IR-2c     | 0.1       | 36.91          | 12.9748           | 2.845                | 2.242            | 14.7         | 0                 | 3.80        | 2.50       | 15.217                 |
| 8   | IR-3a     | 0.1       | 60.30          | 22.8400           | 2.640                | 1.704            | 6.9          | 0                 | 5.00        | 2.50       | 24.544                 |
| 9   | IR-3b     | 0.1       | 58.79          | 21.2745           | 2.763                | 3.270            | 13.3         | 0                 | 5.00        | 2.50       | 24.544                 |
| 10  | IR-3c     | 0.1       | 55.48          | 20.9707           | 2.646                | 1.609            | 7.1          | 0                 | 4.60        | 2.50       | 22.580                 |
| 11  | IR-3d     | 0.1       | 49.87          | 18.8501           | 2.646                | 1.276            | 6.3          | 0                 | 4.10        | 2.50       | 20.126                 |

⊥ Experiments loaded perpendicular to bedding plane

## References

- Haskett, Steven E., Narahara, Gene M., and Stephen A. Holditch. "A Method for Simultaneous Determination of Permeability and Porosity in Low-Permeability Cores." SPE Form Eval 3 (1988): 651–658. doi: <https://doi.org/10.2118/15379-PA>
- Silva, G. F., J. O. Araújo Filho, M. G. Von Huelsen, C. N. Chimpliganond, and G. S. França (2014). Influence of Brazilian structures on the reservoir-induced seismicity case of Irapé Hydroelectric Plant, Minas Gerais, Brazil, Braz. J. Geol. 44, no. 3, 375–386, DOI: 10.5327/Z2317-4889201400030004.
